# Gestational Exposure to Low Dose Bisphenol A Alters Social Behavior in Juvenile Mice

Jennifer T. Wolstenholme<sup>1</sup>, Julia A. Taylor<sup>2</sup>, Savera R. J. Shetty<sup>1</sup>, Michelle Edwards<sup>1</sup>, Jessica J. Connelly<sup>3</sup>, Emilie F. Rissman<sup>1\*</sup>

**1** Department of Biochemistry and Molecular Genetics, University of Virginia School of Medicine, Charlottesville, Virginia, United States of America, **2** Division of Biological Sciences, University of Missouri, Columbia, Missouri, United States of America, **3** Cardiovascular Medicine, University of Virginia School of Medicine, Charlottesville, Virginia, United States of America

## Abstract

Bisphenol A (BPA) is a man-made compound used to make polycarbonate plastics and epoxy resins; public health concerns have been fueled by findings that BPA exposure can reduce sex differences in brain and some behaviors. We asked if a low BPA dose, within the range measured in humans, ingested during pregnancy, would affect social behaviors in prepubertal mice. We noted sex differences in social interactions whereby females spent more time sitting side-by-side, while males engaged in more exploring and sitting alone. In addition BPA increased display of nose-to-nose contacts, play solicitations and approaches in both sexes. Interactions between sex and diet were found for self grooming, social interactions while sitting side-by-side and following the other mouse. In all these cases interactions were produced by differences between control and BPA females. We examined brains from embryos during late gestation to determine if gene expression differences might be correlated with some of the sexually dimorphic or BPA affected behaviors we observed. Because BPA treatments ended at birth we took the brains during embryogenesis to increase the probability of discovering BPA mediated effects. We also selected this embryonic age (E18.5) because it coincides with the onset of sexual differentiation of the brain. Interestingly, mRNA for the glutamate transporter, *Slc1a1*, was enhanced by exposure to BPA in female brains. Also we noted that BPA changed the expression of two of the three DNA methyltransferase genes, *Dnmt1* and *Dnmt3a*. We propose that BPA affects DNA methylation of *Slc1a1* during neural development. Sex differences in juvenile social interactions are affected by BPA and in particular this compound modifies behavior in females.

**Citation:** Wolstenholme JT, Taylor JA, Shetty SRJ, Edwards M, Connelly JJ, et al. (2011) Gestational Exposure to Low Dose Bisphenol A Alters Social Behavior in Juvenile Mice. PLoS ONE 6(9): e25448. doi:10.1371/journal.pone.0025448

**Editor:** Pier Francesco Ferrari, Università di Parma, Italy

**Received:** June 21, 2011; **Accepted:** September 5, 2011; **Published:** September 28, 2011

**Copyright:** © 2011 Wolstenholme et al. This is an open-access article distributed under the terms of the Creative Commons Attribution License, which permits unrestricted use, distribution, and reproduction in any medium, provided the original author and source are credited.

**Funding:** This work is supported by National Institute of Mental Health (NIMH) R01 MH086711 and Autism Speaks grant #4802 (EFR). JTW received 21 support from National Institute of Diabetes and Digestive and Kidney Diseases (NIDDK) T32 DK007646 and is now supported by National Research Service Award (NRSA) F32ES01940. The funders had no role in study design, data collection and analysis, decision to publish, or preparation of the manuscript.

**Competing Interests:** The authors have declared that no competing interests exist.

\* E-mail: Rissman@virginia.edu

## Introduction

Bisphenol A (BPA) is a synthetic monomer used to manufacture polycarbonate plastics (i.e. food and water containers) and epoxy resins (i.e. canned food linings). Exposure to this chemical is fairly ubiquitous; as it has been detected in urine in 90% of all humans sampled [1]. BPA is detectable in maternal and fetal plasma in ranges from 0.3 to 18.9 and 0 to 9.2 ng/ml respectively [2]. Several countries have banned BPA in production of new products based on findings from animal studies that suggest BPA can affect the development of prostate, brain and behavior [3,4,5,6,7]. Neonatal treatment with BPA in general reduces sex differences in the brain and can modify neurite and dendrite formation [3,8,9,10,11]. Pre- and/or peri-natal exposure to BPA in rodents is associated with cognitive impairments and decreased exploration in a novel environment [12,13,14]. BPA can also influence social interactions and anxiety in rodents [7,15,16,17]. In cynomolgus monkeys, prenatal BPA exposure in male offspring is correlated with increased outward looking and exploration, and it affects behavior of the mothers [18]. In humans, a positive association between gestational levels of BPA in mothers and externalizing (hyperactivity and aggression) behaviors in 2 year old

girls has been reported [19]. This convergence of data demonstrates that BPA exposure during gestation affects the brain and a number of behaviors in several mammalian species.

Steroid hormones organize sex differences in the brain during neonatal development [20,21]. BPA has steroid-like properties and binds to both estrogen receptors (ER $\alpha$ , ER $\beta$ ) with low affinity [22,23]. It also binds the estrogen membrane receptor (GPER) with high affinity [23] as well as androgen and thyroid receptors [24,25,26,27]. Many authors have suggested that BPA exposure disrupts sexually dimorphic brain development and behaviors via its actions on the steroid receptors [9,11,28]. In addition to steroid-related effects, BPA may have even more global actions as it can act to alter DNA methylation [29]. Dysregulation of DNA methylation during these critical developmental windows could disrupt the normal progression of brain and endocrine system development causing robust changes in the developing embryo that can persist into adulthood or even beyond if effects extend to germ cells [30]. In addition, these two mechanisms may act synergistically, as DNA methyltransferases have been shown to have a number of interactions with estrogen receptors, particularly with ER  $\beta$  [31].

In this set of studies we exposed female mice to a low dose of BPA mixed into food pellets. We validated our dose by measuring

BPA concentrations in blood from pregnant dams consuming the diet. We assessed social interactions in juveniles gestated on control or BPA containing diets. We are interested in this period because, in humans it is a time when many neurodevelopmental disorders that have a social behavior component, are first detected. Moreover, many such disorders are skewed in their expression toward males, one well known example is Autism Spectrum Disorder (ASD) which is four times more prevalent in boys than in girls [32]. Because sexual differentiation of the hypothalamus begins in late gestation, we collected embryos on embryonic day 18.5 (E18.5) to assess differences in gene expression of candidate genes in control versus BPA exposed brains. We assessed gene expression with qPCR for the known estrogen receptors, DNA methyltransferases, and several genes related to glutamate and GABA transmission that have been identified as potential BPA targets in other studies [33]. Finally we examined mRNA for the oxytocin receptor because it has been implicated in a variety of social behaviors [34,35].

## Methods

### Animals

All procedures were conducted in compliance with the University of Virginia Animal Use and Care Committee and in strict accordance with the recommendations in the Guide for the Care and Use of Laboratory Animals of the National Institutes of Health. All mice were housed on a 12:12 light (lights off at 1300 EST). Adult female C57BL/6J (B6) mice were randomly assigned to one of two groups and placed on either a phytoestrogen-free chow (n = 11; Harlan Teklad, TD95092) or the same chow supplemented with 1.25 mg BPA per kg diet (n = 12; Harlan Teklad, TD09710). All females consumed their assigned diets (food and water) ad libitum. Over the last 10 days of gestation dams ingest about 4 grams daily of this type of chow [16]. At this dose of BPA we calculate intake to be roughly 5 µg of BPA daily. The US EPA lowest observed adverse effect level (LOAEL) for humans is 50 mg/kg/day [36]. To determine the maximum concentration believed to be safe, even for daily exposure, the EPA divides this dose by a 1,000-fold safety factor (50 µg/kg/day). Thus, a 150 pound (68 kg) pregnant woman could “safely” consume 3.4 mg BPA per day and our dose is 680 times lower than the LOAEL.

For embryo collection females were placed on one of the two diets as above. After one week on the diets, males were added to each cage with a single female, and every morning we checked for plugs. The day a plug was discovered was designated E0.5 and when a plug was noted the male cage mate was removed. Pregnant females were collected in the morning on E18.5, rapidly sacrificed with isoflurane and embryos extracted. Embryo brains were collected quickly and frozen on dry ice. Embryos were sexed by PCR [37] and we limited our use to embryos positioned *in utero* next to at least one male littermate to reduce any potential variation caused by intrauterine position [38]. We collected brains from 10 litters for use in this experiment (BPA n = 5, Control n = 5).

For the behavioral studies females were placed on one of the two diets and paired with a male as described above. Males remained with the females for seven days. Within 12 hours after birth all pups (from control and BPA consuming dams) were fostered to another dam that had delivered pups within the past 24 hours and was consuming the control diet. We did this to limit offspring exposure to BPA to the gestational period and because differences in maternal behavior caused by BPA might affect behavior [16,39]. Foster dams (n = 20) had mixed litters of their biological, same-age pups (not in the study), and fostered pups. For identification purposes we randomly clipped tail tips of either the

biological or foster pups at the time of fostering. All pups (BPA: n = 39; 18 females and 21 males, control: n = 28; 13 females and 15 males) remained with their dams until post natal (PN) 21, at which time they were group housed by litter and sex and tested for behaviors (see below).

### BPA assay

Pregnant dams, on gestation day 18.5, consuming control (n = 3) or BPA-supplemented diet (n = 4) were anesthetized with isoflurane and blood was collected by cardiac puncture, spun and serum frozen. Pooled sets of serum samples (~0.3–0.8 ml) were aliquoted into glass tubes and spiked with an internal standard and extracted twice with methyl tert-butyl ether (Fisher Scientific, Pittsburgh, PA). The ether extracts were dried in glass tubes under nitrogen and reconstituted in 60:40 methanol:water. Unconjugated (free) BPA was measured by HPLC with an ESA CoulArray 5600 detector. Separation was performed on a reverse-phase 250 mm Prodigy C18 column (Phenomenex), with a mobile phase of 36:24:40 acetonitrile: methanol: 0.05 M sodium acetate buffer (pH 4.8), and with the CoulArray cell potentials set at 325, 400, 720 and 875 mV. Bisphenol A (Sigma, St. Louis, MO) was used as the internal standard. Quantitation was made against standard curves of both analytes, and extraction efficiency was assessed from recovery of the internal standard, which averaged over 95%. The limit of detection (LOD) for BPA in serum by these methods was 0.5 ng/ml based on extraction of 0.5 ml of serum, and values below this level were estimated by extrapolation of the standard curve to zero. BPA was not detected by HPLC in either the assay blanks or in the solvent blanks used in the standard curve, nor in the tubes used to collect blood and store serum. Solvents and water used in the assay were HPLC grade, and previously tested negative for BPA. Use of plastic in the assay was limited to pipet tips (previously established not to leach BPA).

### Behavior Tests

Habituation and behavior tests were conducted in the dark (between 1300 and 1800 hours) under red light. Behaviors were recorded and later scored by an observer blind to sex and treatment group.

**Juvenile social interactions.** On PN20, the day before weaning, mice were singly housed in a novel standard mouse cage, with bedding but no food or water, for 1 hour to habituate to this novel environment. After habituation, mice were returned to their home cages with their siblings and dam. On PN21 mice were again habituated to the test room in a clean standard mouse cage for 1 hour then placed into another clean cage with a same age, sex and treatment mouse from another litter. Social interactions were recorded for both mice for 30 minutes. Mice were evaluated for a number of social and non-social behaviors using Noldus Observer (5.0) software (Noldus, Leesburg, VA, USA). Details on our methods and scoring are published [40,41]. The social behavior categories included total amount of time spent displaying; side-by-side sitting, grooming their partners or engaged in side-by-side non-grooming interactions (including digging or manipulating bedding). Non-social behaviors consisted of time spent exploring the cage, self-grooming, and sitting alone. Some behaviors are of short duration, and thus it is more appropriate to score their frequencies. The frequencies of interactive behaviors we recorded included acts of nose-to-nose or anogenital sniffing, crawling over or under the other mouse, pushing the other mouse, approaching the other mouse head-on and following the other mouse. After these interactions mice were housed singly for the duration of the behavioral testing schedule.

**Elevated plus maze.** On PN22, each mouse was tested on the elevated plus maze as previously described [42]. Behavior was recorded for 10 minutes. The total time spent in the closed and open arms and the numbers of crosses through the middle were scored. Time spent in the middle of the maze was calculated based on the total duration of the test less the time in the two arms. The open arm was subdivided into proximal and distal halves and time in each was recorded.

**Social preference tests.** On PN24, mice were habituated to a testing room for one hour then placed into the center section of a three-chambered Plexiglas box (76.2 cm × 26.67 cm × 17.78 cm), divided by black Plexiglas walls and backed by black Plexiglas so that the center section was darkened on 3 sides with 2 openings leading to the outer chambers each containing a small metal cylinder with a round top (10.16 cm diam. × 13.97 cm) and vertical bars (spaced 1 cm apart), hereafter referred to as a “jail cell”. Mice were habituated to the test box in the center section with both doors closed for 10 minutes. After 10 minutes the doors were opened and the mouse was allowed to freely explore all three chambers for an additional 10 minutes. Mice were once again closed into the center section and a novel adult male was randomly placed in one of the jail cells. The use of an adult male is based on work by others in the field [43,44]. The doors were opened to allow mice to explore all three chambers and data were collected for 10 minutes. The time spent in each chamber, the time spent sniffing each jail cell, and the numbers of entries into each side were all scored by an observer blind to sex and treatment group (adapted from [43,44] and described in detail [16]).

### Quantitative real time PCR

Total RNA was isolated from the brain tissue of male and female embryos (E18.5; n = 5–6/group) from dams given control or BPA-supplemented diet. cDNA was generated from 500 ng of total RNA by reverse transcription with iScript cDNA kit (Bio-Rad). Real time PCR was performed using the iCycler iQ™ System (Bio-Rad) according to the manufacturer’s instructions for TaqMan and SYBR Green based detection. Samples were run in quadruplicates in either one or two plates. The average of the four replicates was used for data analysis. TaqMan probes for *Esr1*, *Esr2*, *Gper*, *Oxtr* and *B2M* (control gene) were obtained from Applied Biosystems (Carlsbad, CA). SYBR Green primers were designed for *Gria1*, *Grin2a*, *Grin2b*, *Dnmt1*, *Dnmt3a*, *Dnmt3b*, *Slc1a1* and  $\beta$ -actin (control gene). Primer sequences for these genes can be found in Table 1. Quantification of candidate gene expression levels was calculated based on the threshold cycle ( $C_t$ ) for each well using the provided software and normalized to B2M for TaqMan assays and  $\beta$ -actin for SYBR Green assays as endogenous controls.

### Statistical analysis

All data were analyzed using NCSS (2001). For behavioral data, we used two-way ANOVA with sex and diet as factors. Significant results were assessed by Fisher Exact post-hoc tests that adjust significance levels to take multiple comparisons into account. For gene expression data, normalized gene expression was calculated using the delta-delta Ct method [45]. We used two-way ANOVA with sex and diet as factors and significant results were assessed by Fisher’s post hoc tests with Bonferroni’s corrections for multiple comparisons.

## Results

### Plasma levels of BPA comparable to human exposure levels

Supplementing phytoestrogen-free chow with a low dose of BPA (1.25 mg per kg diet), increased blood BPA levels in gestating dams. Serum BPA levels in pregnant dams on control phytoestrogen-free

**Table 1.** Primer Sequences for SYBR Green qPCR assays.

| Primer                 | Sequence                  | Primer Efficiency |
|------------------------|---------------------------|-------------------|
| <i>Bactin</i> Forward  | GCCACCAGTTCGCCATGGAT      | 103%              |
| <i>B actin</i> Reverse | TCTGGGCTCGTACCCACATA      |                   |
| <i>Dnmt1</i> Forward   | CCGCAGGCGGTCAAAAGACTT     | 99%               |
| <i>Dnmt1</i> Reverse   | GCTCCCGTTGGCGGGACAAC      |                   |
| <i>Dnmt3a</i> Reverse  | CTGGAAGGTGAGTCTTGCA       | 89%               |
| <i>Dnmt3a</i> Forward  | GAGGGAAGTCTGAGACCCAC      |                   |
| <i>Dnmt3b</i> Forward  | AGCGGGTATGAGGAGTGCAT      | 103%              |
| <i>Dnmt3b</i> Reverse  | GGGAGCATCCTCTGTGTCTG      |                   |
| <i>Gria1</i> Forward   | TCCACTAGACCACCATCCCTTTTGT | 91%               |
| <i>Gria1</i> Reverse   | ACAGAGCCTGCAAACCATGGGT    |                   |
| <i>Grin2a</i> Forward  | TGGTATTGCCGCCCTTCTGGT     | 85%               |
| <i>Grin2a</i> Reverse  | TCACGTCGTGGCTGTGACCCA     |                   |
| <i>Grin2b</i> Forward  | TTCTATCCCCGGCATCCAGCG     | 110%              |
| <i>Grin2b</i> Reverse  | CGTGGAGCGTGGTCAATCCCA     |                   |
| <i>Slc1a1</i> Forward  | ATGTAATGGGGGCTTCGCGG      | 100%              |
| <i>Slc1a1</i> Reverse  | AGATGGCTCCTGTGGAGACGCC    |                   |

doi:10.1371/journal.pone.0025448.t001

diet was barely detectable at  $0.099 \pm 0.014$  ng/ml (n = 3). However, serum BPA levels in dams fed 1.25 mg/kg BPA supplemented phytoestrogen-free diet were four fold higher at  $0.43 \pm 0.002$  ng/ml (n = 2). Thus this dose produces BPA exposure well within the range detected in human maternal blood, 0.3 to 18.9 ng/ml [2].

### Gestational BPA exposure affects social interactions particularly in females

Several of the behaviors observed were sexually dimorphic. In general, males spent more time engaging in non-social behaviors, while females spent more time in social contact. Males spent more time exploring the cage and sitting alone ( $F_{1,63} = 6.8, 4.91$ , respectively  $p < 0.05$  at least) as compared to females. In contrast, females spent more time sitting side-by-side than did males ( $F_{1,63} = 3.92, p = 0.05$ , Figure 1 and Table 2).

Interactions between diet and sex were noted for several other behaviors and in all cases the interactions were caused by differences between BPA and control females. Side-by-side interactions that did not include grooming ( $F_{1,63} = 8.13, p < 0.006$ ) were exhibited for a longer duration by BPA exposed females as compared to the control females ( $p < 0.05$ ). An example of this behavior is sitting together in a corner and sifting through the bedding. An interaction in the numbers of times one mouse followed its partner was found ( $F_{1,63} = 5.01, p < 0.03$ ). Again, BPA treated females performed following more often than control females ( $p < 0.05$ ). Lastly, self-grooming also showed an interaction ( $F_{1,63} = 5.51, p < 0.02$ ) caused by differences between BPA and control females. Of interest this non-social behavior was exhibited for a longer time by control than BPA treated females. In general these results suggest that BPA treated females are more interactive than controls.

Diet affected the frequencies of nose-to-nose contacts, and numbers of approaches. For both of these contact behaviors mice exposed to BPA displayed more than controls ( $F_{1,63} = 3.99, 3.82$  respectively;  $p < 0.05$ ). No differences were noticed in the duration of time spent grooming the partner, ano-genital sniffing, crawling and pushing. These behaviors were also exhibited in very low amounts.

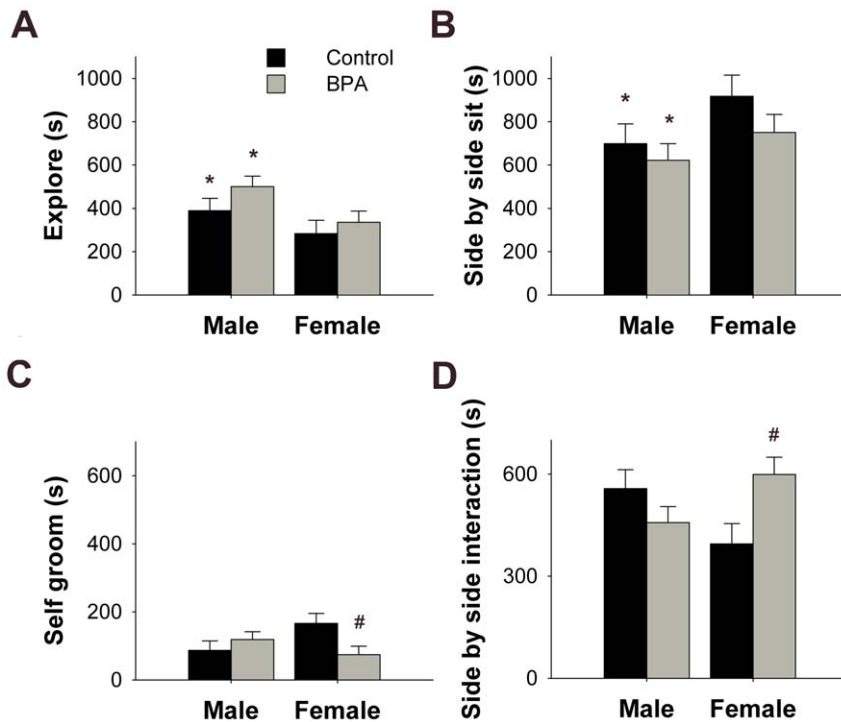

**Figure 1. Mean +/- SEM behaviors displayed during a reciprocal social interaction task.** Juvenile male and female mice were exposed to control (phytoestrogen-free chow, black histograms, n = 15 males and n = 13 females) or BPA supplemented chow (gray histograms, n = 21 males and n = 18 females) during gestation. **A)** Total amount of time in seconds spent exploring the cage. **B)** Duration of side by side sitting (seconds). **C)** Amount of time spent self grooming (seconds). **D)** Duration of side by side interactions (seconds). \* Sex effect; males are significantly different from females, p<0.05. # Significantly different from control females, p<0.05. doi:10.1371/journal.pone.0025448.g001

**BPA did not affect social preferences or anxiety in juveniles**

Social preference in this task was sexually dimorphic in the juvenile mice. Investigation of an adult C57BL/6J male was greater in males as compared with females ( $F_{1,66} = 4.43, p < 0.05$ )

and no activity differences were detected as the number of times that mice crossed between the three sections of the test box did not vary by group (Table 3). Gestational exposure to BPA did not affect social preference for the stimulus animal, nor did it alter the sexual dimorphism observed in controls. Anxiety, assessed in the

**Table 2. Mean +/- SEM time spent (in seconds) or frequencies of different types of behavior in a 30- minute social interaction test.**

|                                                | Control Male n=15 | BPA Male n=21 | Control Female n=13 | BPA Female n=18 |
|------------------------------------------------|-------------------|---------------|---------------------|-----------------|
| Groom partner (s)                              | 31.2±9.9          | 17.8±9.8      | 27.6±13.0           | 20.2±4.5        |
| Side by Side Sitting (s)                       | 698.9±78.0        | 621.8±78.6    | 917.5±110.3 !       | 750.1±84.7 !    |
| Side by Side behaviors other than grooming (s) | 557.1± 40.5       | 457.1±45.9    | 394.7± 53.3         | 599.0±63.4 *    |
| Self Groom (s)                                 | 87.1±17.6         | 118.5±20.8    | 166.0±49.4          | 74.1±16.7 *     |
| Sit Alone (s)                                  | 12.0±12.0 !       | 66.1±26.1 !   | 10.4±9.3            | 0.0±0.0         |
| Explore (s)                                    | 389.2±49.7 !      | 500.5±48.9 !  | 283.2±79.8          | 335.5±44.5      |
| Anogenital Sniff                               | 0.1±0.1           | 0.3±0.1       | 0.1±0.1             | 0.2±0.1         |
| Nose-Nose Sniff                                | 1.9±0.4           | 3.1±0.6 #     | 1.7±0.5             | 2.7±0.6 #       |
| Crawl                                          | 1.1±0.3           | 0.9±0.3       | 0.7±0.3             | 1.2±0.4         |
| Follow other animal                            | 0.67±0.23         | 0.33±0.12     | 0.23±0.12           | 0.89±0.31 *     |
| Push                                           | 0.2±0.1           | 0.5±0.2       | 0.2±0.1             | 0.2±0.1         |
| Approach                                       | 3.2±0.5           | 4.2±0.7 #     | 2.8±0.7             | 4.9±0.9 #       |

! Significant effect of sex p<0.05,  
 \* Significantly different from the same sex control p<0.05,  
 # Significant effect of diet p<0.05.  
 doi:10.1371/journal.pone.0025448.t002

elevated plus maze, did not differ between the groups. The time spent in the open arms, closed arms and the number of crosses between arms were similar in all groups (Table 4).

### BPA exposure affects gene expression

Two very interesting candidate genes were affected by diet and sex. Expression of the glutamate transporter, *Scl1a1*, was sexually dimorphic ( $F_{1,18} = 4.58$ ,  $p < 0.05$ ) with females having higher mRNA than males, and a significant interaction between diet and sex ( $F_{1,18} = 5.84$ ,  $p < 0.04$ , Figure 2) was noted. The interaction was caused by the female BPA group, which had higher expression levels than any other groups. Expression of the oxytocin receptor indicated a trend for an interaction ( $F_{1,18} = 4.14$ ,  $p = 0.06$ ; Figure 2). This trend was caused by the BPA male group, which had significantly less *Oxtr* mRNA than any other group ( $p < 0.05$ , Figure 2).

BPA can bind estrogen receptors and also affects methylation of DNA. We examined expression of three estrogen receptor genes, *Esr1*, *Esr2*, and *Gper*; none of which was impacted by diet or sex (Table 5). We also quantified mRNA for the three DNA methyltransferase genes; *Dnmt1*, *Dnmt3a* and *Dnmt3b*. Both *Dnmt1* and *Dnmt3a* genes were responsive to diet and/or sex. BPA exposure increased expression of *Dnmt3a* as main effects of diet were observed ( $F_{1,18} = 5.13$ ,  $p < 0.04$ ). At embryonic day 18.5, *Dnmt3a* expression was also sexually dimorphic ( $F_{1,18} = 5.49$ ,  $p < 0.04$ ) with males having more mRNA than females. *Dnmt1* expression exhibited a trend for interaction between sex and diet ( $F_{1,18} = 3.68$ ,  $p < 0.07$ ) produced by a lowest amount of mRNA in brains of BPA exposed females as compared with all other groups ( $p < 0.05$ , Figure 2). Expression of *GluR1*, *Grin2a* and *Grin2b* were not influenced by sex or diet (Table 5).

### Discussion

Our goal was to assess the effects of BPA on several behaviors in juvenile mice using a very low dose of BPA, within a range comparable to humans. We also limited exposure to the gestational period when most neural development occurs. We did so not only to limit the exposure time but also to remove the complicating effects that BPA may have on maternal behavior [16,39]. Thus by fostering all pups to dams on control diet, we control for the potential contribution of differences in maternal care. Needless to say fostering introduces a new set of issues, which we controlled for here by fostering all the animals used in the experiments. Incorporating BPA in chow we produced tonic levels in mouse dams comparable to humans and we assume these were also achieved in the embryos. BPA readily crosses the placenta [46,47], exposing fetal tissues to concentrations close to those in maternal placenta [48]. Furthermore, in its inactivate conjugated

form, BPA, can be unconjugated and re-activated in the fetus [47]. Thus, our dosing method is a highly relevant for studying the effects of gestational BPA exposure and subsequent behavioral and genomic profiles. Using a dose well below the LOAEL, given only during gestation, we detected several effects of BPA in diet on juvenile social behaviors as well as embryonic gene expression in whole brain, which may underlie the observed behavioral effects.

Our most striking findings were in females exposed to BPA during a juvenile dyadic social interaction task. This is an “open-ended” task used to identify social, non-social, play-soliciting and investigative behaviors between pairs of mice of the same sex and age [40,41]. BPA exposed females displayed increased social interactions. They engaged in more side-by-side interactions and followed each other more than pairs of control females. They also displayed less self grooming, a non-social behavior. Moreover, in two other measures of partner interactions; nose-to-nose investigations and approaches, BPA treated animals were more gregarious than controls. Together, these results suggest that gestational exposure to BPA in female mice increases social investigations and interactions. BPA exposure, particularly when restricted to critical brain developmental periods, alters the sexually dimorphic brain and in certain behaviors, females appear to be more sensitive to the effects of BPA. For example, BPA exposure decreased the number of tyrosine hydroxylase (TH) positive cells in females, eliminating the sexual dimorphism in the anteroventral periventricular region of the hypothalamus [11]. Females exposed to BPA during the period of brain sexual differentiation were less reactive and explored a novel environment less than control females [49]. Amphetamine-induced conditioned place preference is also disrupted in female mice exposed to BPA during gestation while males displayed no change in place preference [50]. In rats, BPA exposure at various time points during gestation and after birth affects juvenile social behaviors. In juvenile females, BPA increased both non-social and social investigation [15]. When tested with males, juvenile females exposed to BPA exhibited reduced play and social grooming. In a study comparing male and female rat juvenile social behavior, BPA reduced social interest in both sexes but a lower dose exposure increased social approach and interactions in females [17]. Our data add to these conclusions showing that in juvenile female mice, even at very low doses, BPA *in utero* increases their display of social interactions.

Interestingly in the present study, juvenile males were less social than females, exhibiting higher levels of cage exploration and sitting alone than did females. Females on the other hand spent more time in side-by-side sitting than did males. Sex differences have been reported in normal C57BL/6J juvenile mice tested in the same manner reported here [41]. In that study, males engaged in more social interactions, and females performed more play soliciting. In CD-1 mice, on several tasks, BPA exposure reduced

**Table 3.** Mean  $\pm$  SEM time spent in one of three chambers in a 3-chambered preference test with an adult mouse stimulus animal.

|                              | Sociability Score  | Time with Mouse (s) | Time in Empty (s) | Time in Center (s) |
|------------------------------|--------------------|---------------------|-------------------|--------------------|
| <b>Control Male</b> n = 15   | 140.5 $\pm$ 40.7 * | 321.0 $\pm$ 26.5 *  | 180.5 $\pm$ 18.2  | 98.4 $\pm$ 20.3    |
| <b>BPA Male</b> n = 21       | 51.6 $\pm$ 44.0 *  | 252.2 $\pm$ 28.5 *  | 200.6 $\pm$ 19.0  | 143.7 $\pm$ 20.8   |
| <b>Control Female</b> n = 13 | 15.2 $\pm$ 55.1    | 245.4 $\pm$ 29.3    | 230.2 $\pm$ 29.9  | 124.3 $\pm$ 21.3   |
| <b>BPA Female</b> n = 18     | -0.8 $\pm$ 30.8    | 212.1 $\pm$ 21.9    | 213.0 $\pm$ 20.2  | 177.2 $\pm$ 30.8   |

Sociability Score = time with mouse minus time in empty.

\*Effect of sex,  $p < 0.05$ .

doi:10.1371/journal.pone.0025448.t003

**Table 4.** Mean  $\pm$  SEM time spent in different sections of the elevated plus maze during a 10 minute test.

|                     | Open (s)      | Distal Open (s) | Closed (s)     | Center (s)     | # Crosses    |
|---------------------|---------------|-----------------|----------------|----------------|--------------|
| Control Male n=15   | 78.9 $\pm$ 5  | 36.6 $\pm$ 3    | 399.8 $\pm$ 12 | 121.4 $\pm$ 10 | 23.8 $\pm$ 2 |
| BPA Male n=21       | 75.5 $\pm$ 6  | 34.4 $\pm$ 4    | 407.7 $\pm$ 12 | 116.8 $\pm$ 9  | 23.1 $\pm$ 1 |
| Control Female n=13 | 80.0 $\pm$ 15 | 33.5 $\pm$ 8    | 410.9 $\pm$ 23 | 109.1 $\pm$ 11 | 22.8 $\pm$ 3 |
| BPA Female n=18     | 77.9 $\pm$ 8  | 33.9 $\pm$ 4    | 409.8 $\pm$ 15 | 112.2 $\pm$ 9  | 22.7 $\pm$ 2 |

No significant differences were found in any anxiety phenotype in juvenile mice exposed to BPA.  
doi:10.1371/journal.pone.0025448.t004

the sex differences observed in controls [49]. Several procedural differences between these studies likely cause the variation in results. In the present studies, all mice were reared on a phytoestrogen-free chow, as opposed to normal rodent chow containing phytoestrogens. Phytoestrogens in chow can enhance sex differences in the brain and in behavior [51,52,53,54,55]. Second, mice in the present study were fostered at birth and we cannot exclude the possibility that fostering may have as yet unidentified effects which alter the display of sex differences. The few studies directly assessing the effects of fostering on maternal rearing behavior have conflicting results [56,57] but raise the possibility that C57BL/6J dams may lick and/or groom the fostered pups more than their biological pups.

In a preference task, juvenile males spent more than 50% of their time in the chamber with an adult male mouse instead of the

empty chamber. Exposure to BPA at the current dose did not significantly alter these behaviors. However a 40-fold higher BPA dose decreased male social preference in the identical task [16]. Likewise we did not find any effects of sex or BPA on elevated plus maze behavior in the current study. Yet again, exposure to the 40-fold higher BPA dose decreased time in the middle, increased time in the closed arm, and tended to decrease time in the outer most portion of the open arm [16], indicating that BPA at this high dose increased anxiety-related behaviors in the plus maze. These data demonstrate that different juvenile behaviors are affected by different doses of BPA.

There are several potential mechanisms underlying the sex-specific behavioral responses to BPA exposure. Males, but not females, experience a surge of testosterone (and estradiol) during the last few days of gestation [52]. Thus endogenous estrogens may

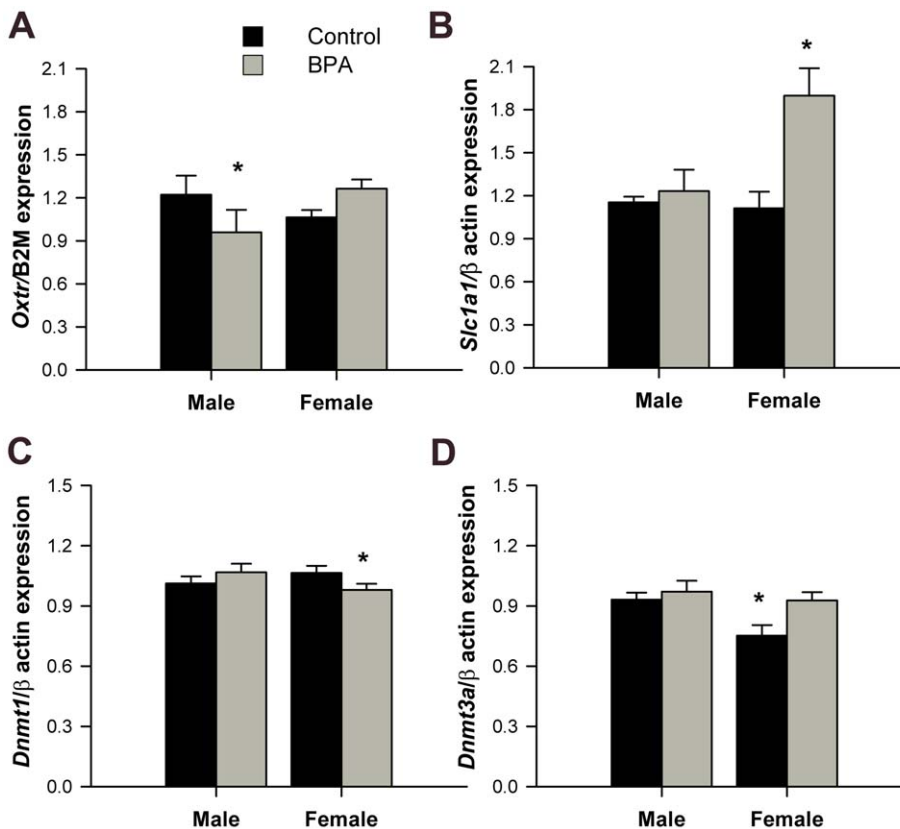

**Figure 2.** Mean  $\pm$  SEM mRNA expression measured with qPCR in embryonic day 18.5 brain relative to control males and normalized to beta-2 microglobulin or beta-actin (n=5–6/group). Black bars indicate groups exposed to control, phytoestrogen-free diet. Gray bars indicate groups exposed to BPA during gestation. A) Oxytocin receptor (*Oxtr*). B) Neuronal glutamate transporter (*Slc1a1*). C) DNA methyltransferase 1 (*Dnmt1*). D) DNA methyltransferase 3a (*Dnmt3a*). Significantly different from all other groups,  $p < 0.05$ .  
doi:10.1371/journal.pone.0025448.g002

**Table 5.** Mean  $\pm$  SEM for gene expression in E18.5 brains relative to control males and normalized to beta-2-microglobulin or beta-actin.

|                       | <i>Esr1</i>     | <i>Esr2</i>     | <i>Gper</i>     | <i>Dnmt3b</i>   | <i>Gria1</i>    | <i>Grin2a</i>   | <i>Grin2b</i>   |
|-----------------------|-----------------|-----------------|-----------------|-----------------|-----------------|-----------------|-----------------|
| <b>Control Male</b>   | 0.76 $\pm$ 0.10 | 1.14 $\pm$ 0.11 | 1.06 $\pm$ 0.02 | 1.05 $\pm$ 0.06 | 0.99 $\pm$ 0.05 | 0.95 $\pm$ 0.09 | 1.01 $\pm$ 0.13 |
| <b>BPA Male</b>       | 0.78 $\pm$ 0.04 | 0.89 $\pm$ 0.16 | 0.95 $\pm$ 0.08 | 1.03 $\pm$ 0.07 | 0.95 $\pm$ 0.04 | 0.85 $\pm$ 0.04 | 0.98 $\pm$ 0.09 |
| <b>Control Female</b> | 0.71 $\pm$ 0.02 | 1.15 $\pm$ 0.07 | 1.15 $\pm$ 0.04 | 0.98 $\pm$ 0.03 | 0.95 $\pm$ 0.02 | 0.71 $\pm$ 0.05 | 0.94 $\pm$ 0.05 |
| <b>BPA Female</b>     | 0.77 $\pm$ 0.03 | 1.06 $\pm$ 0.05 | 1.11 $\pm$ 0.06 | 0.96 $\pm$ 0.05 | 1.04 $\pm$ 0.07 | 0.82 $\pm$ 0.04 | 1.11 $\pm$ 0.06 |

*Esr1* = estrogen receptor alpha, *Esr2* = estrogen receptor beta, *Gper* = G protein-coupled estrogen receptor, *Dnmt3b* = DNA methyltransferase 3b, *Gria1* = AMPA ionotropic glutamate receptor, *Grin2a* = NMDA receptor subunit 2a, *Grin2b* = NMDA receptor subunit 2b.

These genes were not significantly altered by BPA exposure or sex. N=5–6 brains in each group.

doi:10.1371/journal.pone.0025448.t005

out-compete BPA, for example, for estrogen receptor binding sites in males but not in neonatal females that are not experiencing an endogenous hormone surge. Another possibility is that genes on sex chromosomes may interact with BPA [58]. Our embryonic gene expression results tend to support the first potential mechanism. We assayed expression levels of estrogen receptor (ER) genes in E18.5 brains to ask if BPA would affect their expression. We selected this embryonic age because it is when brain sexual differentiation occurs under the influence of sex differences in blood levels of testosterone and brain levels of estrogens [21,52]. We hypothesized that if BPA acted via one or more ER it might down regulate this receptor, perhaps in a manner similar to the natural ligand. However, we found no changes in any of the ER or putative ER genes based on BPA exposure. This does not mean that BPA did not act as a direct ligand for one or more of the ERs. In fact it is likely that BPA did influence ER $\alpha$  since the oxytocin receptor is an ER $\alpha$  target gene and we noted changes in *Oxtr* mRNA [59,60]. In neonatal cortex, estradiol hypermethylates ER $\alpha$  [61] and perhaps the same thing occurs here, but, given that we assayed mRNA in whole brain and ER $\alpha$  expression is not global we may have missed BPA induced changes in expression.

Another mode of BPA action is via direct changes DNA methylation [29]. We assayed the three known DNA methyltransferases, enzymes responsible for the deposition of methyl groups onto cytosines when followed by a guanine. *Dnmt3a*, a gene responsible for *de novo* methylation, was altered by BPA exposure wherein the sex difference in control animals (male>females) was not present in BPA exposed brains because BPA increased *Dnmt3a* expression in females. *Dnmt3a* has been implicated in rewarding behavior and neuronal plasticity in the adult mouse accumbens [62]. *Dnmt1* is the most abundant DNA methyltransferase and is believed to be responsible for the maintenance of DNA methylation. Interestingly, *Dnmt1* gene was decreased by BPA in female embryo brains and we speculate that the drop in this gene might be related to the higher levels of *Slc1a1* in these same brains.

In male mice, exposed to low doses of BPA that are probably comparable to ours, mRNA for ER $\beta$  and several of the NMDA receptors were decreased in hippocampus at day 21 and 56 [33]. In addition in male rats, LTD and LTP were disrupted by a dose of BPA higher than ours [63]. These effects were attributed to functional alterations in dopamine, glutamatergic, and metabotropic glutamate receptors, but in our study none of the genes we

assayed, related to the later two pathways, were affected by BPA. Of course, our treatment period was shorter than theirs; in both studies dams were placed on the BPA diet around E7 and pups stayed on the diet through weaning. Moreover, we examined mRNA at a different time point, but none of the three genes (*Gria1*, *Grin2a*, *Grin2b* and *Esr2*) were affected by diet in our study.

Despite the lack of change in NMDA and AMPA receptors, the largest gene expression effect was noted for *Slc1a1*, one of the glutamate transporter genes, and interestingly its expression was elevated in brains of females exposed to BPA. *Slc1a1* is found throughout the cortex, hippocampus and basal ganglia [64] and functions to buffer local glutamate at excitatory synaptic connections [65]. Behavioral characterization of the *Slc1a1* null mouse is not extensive but with age these animals appear to have impairments in self-grooming and spatial learning [66]. In humans single nucleotide polymorphisms (SNPs) within this gene have been associated with repetitive behaviors and anxiety in children with ASD [67], mental retardation [68] and obsessive compulsive disorder [69,70,71,72]. The last candidate gene we examined, the oxytocin receptor, has long been associated with the display of social behavior in rodents [34]. A polymorphic region of the oxytocin receptor (OXTR) in humans has been associated with empathy and stress reactivity [73]. Additionally, many have speculated that OXTR is involved with autism spectrum disorders. Two genome wide association studies in autistic patients show linkage associations to chromosomal region 3p25.3, which contains OXTR [74,75]. Together, our findings that *in utero* BPA exposure alters expression of *Oxtr* and *Slc1a1* suggest a potential mechanism through which early life exposure to BPA can alter normal signaling in the brain and effect adult neurological disorders such as the pathophysiologies associated with ASD, obsessive compulsive disorder and mental retardation.

## Acknowledgments

The authors thank Aileen Wills and Kayla Quarterman for technical assistance.

## Author Contributions

Conceived and designed the experiments: JW ER. Performed the experiments: JW JT SS ME. Analyzed the data: JW ER. Wrote the paper: JW JJ ER.

## References

- Calafat AM, Kuklenyik Z, Reidy JA, Caudill SP, Ekong J, et al. (2005) Urinary concentrations of bisphenol A and 4-nonylphenol in a human reference population. *Environmental health perspectives* 113: 391–395.
- Schonfelder G, Wittfoht W, Hopp H, Talsness CE, Paul M, et al. (2002) Parent bisphenol A accumulation in the human maternal-fetal-placental unit. *Environ Health Perspect* 110: A703–707.

3. Patisaul HB, Fortino AE, Polston EK (2006) Neonatal genistein or bisphenol-A exposure alters sexual differentiation of the AVPV. *Neurotoxicol Teratol* 28: 111–118.
4. Timms BG, Howdeshell KL, Barton L, Bradley S, Richter CA, et al. (2005) Estrogenic chemicals in plastic and oral contraceptives disrupt development of the fetal mouse prostate and urethra. *Proc Natl Acad Sci U S A* 102: 7014–7019.
5. Nakamura K, Itoh K, Yaoti T, Fujiwara Y, Sugimoto T, et al. (2006) Murine neocortical histogenesis is perturbed by prenatal exposure to low doses of Bisphenol A. *J Neurosci Res* 84: 1197–1205.
6. Farabolini F, Porrini S, Della Seta D, Bianchi F, Dessi-Fulgheri F (2002) Effects of perinatal exposure to bisphenol A on sociosexual behavior of female and male rats. *Environ Health Perspect* 110(Suppl 3): 409–414.
7. Ryan BC, Vandenberg JG (2006) Developmental exposure to environmental estrogens alters anxiety and spatial memory in female mice. *Horm Behav* 50: 85–93.
8. Hajszan T, Leranath C (2010) Bisphenol A interferes with synaptic remodeling. *Front Neuroendocrinol* 31: 519–530.
9. Patisaul HB, Polston EK (2008) Influence of endocrine active compounds on the developing rodent brain. *Brain Res Rev* 57: 352–362.
10. Leranath C, Hajszan T, Szigeti-Buck K, Bober J, MacLusky NJ (2008) Bisphenol A prevents the synaptogenic response to estradiol in hippocampus and prefrontal cortex of ovariectomized nonhuman primates. *Proc Natl Acad Sci U S A* 105: 14187–14191.
11. Rubin BS, Lenkowski JR, Schaeberle CM, Vandenberg LN, Ronsheim PM, et al. (2006) Evidence of altered brain sexual differentiation in mice exposed perinatally to low, environmentally relevant levels of bisphenol A. *Endocrinology* 147: 3681–3691.
12. Tian YH, Baek JH, Lee SY, Jang CG (2010) Prenatal and postnatal exposure to bisphenol A induces anxiolytic behaviors and cognitive deficits in mice. *Synapse* 64: 432–439.
13. Xu XH, Zhang J, Wang YM, Ye YP, Luo QQ (2010) Perinatal exposure to bisphenol-A impairs learning-memory by concomitant down-regulation of N-methyl-D-aspartate receptors of hippocampus in male offspring mice. *Hormones and behavior* 58: 326–333.
14. Poimenova A, Markaki E, Rahiotis C, Kitraki E (2010) Corticosterone-regulated actions in the rat brain are affected by perinatal exposure to low dose of bisphenol A. *Neuroscience* 167: 741–749.
15. Dessi-Fulgheri F, Porrini S, Farabolini F (2002) Effects of perinatal exposure to bisphenol A on play behavior of female and male juvenile rats. *Environ Health Perspect* 110(Suppl 3): 403–407.
16. Cox K, Gatewood J, Howeth C, Rissman E (2010) Gestational exposure to bisphenol A and cross-fostering affect behaviors in juvenile mice. *Horm Behav* 58: 754–761.
17. Porrini S, Belloni V, Della Seta D, Farabolini F, Giannelli G, et al. (2005) Early exposure to a low dose of bisphenol A affects socio-sexual behavior of juvenile female rats. *Brain Res Bull* 65: 261–266.
18. Nakagami A, Negishi T, Kawasaki K, Imai N, Nishida Y, et al. (2009) Alterations in male infant behaviors towards its mother by prenatal exposure to bisphenol A in cynomolgus monkeys (*Macaca fascicularis*) during early suckling period. *Psychoneuroendocrinology* 34: 1189–1197.
19. Braun JM, Yolton K, Dietrich KN, Hornung R, Ye X, et al. (2009) Prenatal bisphenol A exposure and early childhood behavior. *Environ Health Perspect* 117: 1945–1952.
20. Arnold AP (2009) The organizational-activational hypothesis as the foundation for a unified theory of sexual differentiation of all mammalian tissues. *Hormones and behavior* 55: 570–578.
21. Negri-Cesi P, Colciago A, Celotti F, Motta M (2004) Sexual differentiation of the brain: role of testosterone and its active metabolites. *J Endocrinol Invest* 27: 120–127.
22. Kuiper GG, Lemmen JG, Carlsson B, Corton JC, Safe SH, et al. (1998) Interaction of estrogenic chemicals and phytoestrogens with estrogen receptor beta. *Endocrinology* 139: 4252–4263.
23. Wetherill YB, Akingbemi BT, Kanno J, McLachlan JA, Nadal A, et al. (2007) In vitro molecular mechanisms of bisphenol A action. *Reprod Toxicol* 24: 178–198.
24. Sohoni P, Sumpter JP (1998) Several environmental oestrogens are also anti-androgens. *J Endocrinol* 158: 327–339.
25. Moriyama K, Tagami T, Akamizu T, Usui T, Saijo M, et al. (2002) Thyroid hormone action is disrupted by bisphenol A as an antagonist. *The Journal of clinical endocrinology and metabolism* 87: 5185–5190.
26. Xu LC, Sun H, Chen JF, Bian Q, Qian J, et al. (2005) Evaluation of androgen receptor transcriptional activities of bisphenol A, octylphenol and nonylphenol in vitro. *Toxicology* 216: 197–203.
27. Bonfeld-Jorgensen EC, Long M, Hofmeister MV, Vinggaard AM (2007) Endocrine-disrupting potential of bisphenol A, bisphenol A dimethacrylate, 4-n-nonylphenol, and 4-n-octylphenol in vitro: new data and a brief review. *Environ Health Perspect* 115(Suppl 1): 69–76.
28. vom Saal FS, Akingbemi BT, Belcher SM, Birnbaum LS, Crain DA, et al. (2007) Chapel Hill bisphenol A expert panel consensus statement: integration of mechanisms, effects in animals and potential to impact human health at current levels of exposure. *Reprod Toxicol* 24: 131–138.
29. Dolinoy DC, Huang D, Jirtle RL (2007) Maternal nutrient supplementation counteracts bisphenol A-induced DNA hypomethylation in early development. *Proc Natl Acad Sci U S A* 104: 13056–13061.
30. Wolstenholme JT, Rissman EF, Connelly JJ (2011) The role of Bisphenol A in shaping the brain, epigenome and behavior. *Horm Behav* 59: 296–305.
31. Pathak S, D'Souza R, Ankolkar M, Gaonkar R, Balasinar NH (2010) Potential role of estrogen in regulation of the insulin-like growth factor-2-H19 locus in the rat testis. *Mol Cell Endocrinol* 314: 110–117.
32. Fombonne E (2009) Epidemiology of pervasive developmental disorders. *Pediatric research* 65: 591–598.
33. Xu XH, Wang YM, Zhang J, Luo QQ, Ye YP, et al. (2010) Perinatal exposure to bisphenol-A changes N-methyl-D-aspartate receptor expression in the hippocampus of male rat offspring. *Environ Toxicol Chem* 29: 176–181.
34. Insel TR (2010) The challenge of translation in social neuroscience: a review of oxytocin, vasopressin, and affiliative behavior. *Neuron* 65: 768–779.
35. Ross HE, Young LJ (2009) Oxytocin and the neural mechanisms regulating social cognition and affiliative behavior. *Frontiers in neuroendocrinology* 30: 534–547.
36. Agency USEP (1993) Bisphenol A. (CASRN 80-05-7) Integrated Risk Information System Available: <http://www.epa.gov/iris/subst/0356.htm>. Accessed: 2011 Sept 7.
37. Gatewood JD, Wills A, Shetty S, Xu J, Arnold AP, et al. (2006) Sex chromosome complement and gonadal sex influence aggressive and parental behaviors in mice. *J Neurosci* 26: 2335–2342.
38. Gandelman R, vom Saal FS, Reinisch JM (1977) Contiguity to male fetuses affects morphology and behaviour of female mice. *Nature* 266: 722–724.
39. Palanza PL, Howdeshell KL, Parmigiani S, vom Saal FS (2002) Exposure to a low dose of bisphenol A during fetal life or in adulthood alters maternal behavior in mice. *Environ Health Perspect* 110(Suppl 3): 415–422.
40. McFarlane HG, Kusek GK, Yang M, Phoenix JL, Bolivar VJ, et al. (2008) Autism-like behavioral phenotypes in BTBR T-t+/J mice. *Genes Brain Behav* 7: 152–163.
41. Cox KH, Rissman EF (2011) Sex differences in juvenile mouse social behavior are influenced by sex chromosomes and social context. *Genes Brain Behav*.
42. Imwalle DB, Gustafsson JA, Rissman EF (2005) Lack of functional estrogen receptor beta influences anxiety behavior and serotonin content in female mice. *Physiology & behavior* 84: 157–163.
43. Moy SS, Nadler JJ, Perez A, Barbaro RP, Johns JM, et al. (2004) Sociability and preference for social novelty in five inbred strains: an approach to assess autistic-like behavior in mice. *Genes Brain Behav* 3: 287–302.
44. Moy SS, Nadler JJ, Young NB, Nonneman RJ, Grossman AW, et al. (2009) Social approach in genetically engineered mouse lines relevant to autism. *Genes Brain Behav* 8: 129–142.
45. Livak KJ, Schmittgen TD (2001) Analysis of relative gene expression data using real-time quantitative PCR and the 2(-Delta Delta C(T)) Method. *Methods* 25: 402–408.
46. Balakrishnan B, Henare K, Thorstensen EB, Ponnampalam AP, Mitchell MD (2010) Transfer of bisphenol A across the human placenta. *Am J Obstet Gynecol* 202(393): e391–397.
47. Nishikawa M, Iwano H, Yanagisawa R, Koike N, Inoue H, et al. (2010) Placental transfer of conjugated bisphenol A and subsequent reactivation in the rat fetus. *Environ Health Perspect* 118: 1196–1203.
48. Zhang J, Cooke GM, Curran IH, Goodyer CG, Cao XL (2011) GC-MS analysis of bisphenol A in human placental and fetal liver samples. *J Chromatogr B Analyt Technol Biomed Life Sci* 879: 209–214.
49. Gioiosa L, Fissore E, Ghirardelli G, Parmigiani S, Palanza P (2007) Developmental exposure to low-dose estrogenic endocrine disruptors alters sex differences in exploration and emotional responses in mice. *Horm Behav* 52: 307–316.
50. Laviola G, Gioiosa L, Adriani W, Palanza P (2005) D-amphetamine-related reinforcing effects are reduced in mice exposed prenatally to estrogenic endocrine disruptors. *Brain Res Bull* 65: 235–240.
51. Ruhlen RL, Howdeshell KL, Mao J, Taylor JA, Bronson FH, et al. (2008) Low phytoestrogen levels in feed increase fetal serum estradiol resulting in the “fetal estrogenization syndrome” and obesity in CD-1 mice. *Environ Health Perspect* 116: 322–328.
52. Ruhlen R, Taylor J, Mao J, Kirkpatrick J, Welshons W, et al. (2011) Choice of animal feed can alter fetal steroid levels and mask developmental effects of endocrine disrupting chemicals. *Journal of Developmental Origins of Health and Disease* 2: 36–48.
53. Flynn KM, Ferguson SA, Delclos KB, Newbold RR (2000) Effects of genistein exposure on sexually dimorphic behaviors in rats. *Toxicol Sci* 55: 311–319.
54. Kudwa AE, Boon WC, Simpson ER, Handa RJ, Rissman EF (2007) Dietary phytoestrogens dampen female sexual behavior in mice with a disrupted aromatase enzyme gene. *Behav Neurosci* 121: 356–361.
55. Kudwa AE, Harada N, Honda SI, Rissman EF (2009) Regulation of progesterin receptors in medial amygdala: estradiol, phytoestrogens and sex. *Physiol Behav* 97: 146–150.
56. Curley JP, Rock V, Moynihan AM, Bateson P, Keverne EB, et al. (2010) Developmental shifts in the behavioral phenotypes of inbred mice: the role of postnatal and juvenile social experiences. *Behav Genet* 40: 220–232.
57. van der Veen R, Abrous DN, de Kloet ER, Piazza PV, Koehl M (2008) Impact of intra- and interstrain cross-fostering on mouse maternal care. *Genes Brain Behav* 7: 184–192.
58. Arnold AP, Chen X (2009) What does the “four core genotypes” mouse model tell us about sex differences in the brain and other tissues? *Front Neuroendocrinol* 30: 1–9.



59. Kubota Y, Kimura T, Hashimoto K, Tokugawa Y, Nobunaga K, et al. (1996) Structure and expression of the mouse oxytocin receptor gene. *Mol Cell Endocrinol* 124: 25–32.
60. Young LJ, Wang Z, Donaldson R, Rissman EF (1998) Estrogen receptor alpha is essential for induction of oxytocin receptor by estrogen. *Neuroreport* 9: 933–936.
61. Wilson ME, Westberry JM, Trout AL (2010) Estrogen receptor-alpha gene expression in the cortex: Sex differences during development and in adulthood. *Horm Behav* 59: 353–357.
62. LaPlant Q, Vialou V, Covington HE, 3rd, Dumitriu D, Feng J, et al. (2010) Dnmt3a regulates emotional behavior and spine plasticity in the nucleus accumbens. *Nat Neurosci* 13: 1137–1143.
63. Zhou R, Zhang Z, Zhu Y, Chen L, Sokabe M (2009) Deficits in development of synaptic plasticity in rat dorsal striatum following prenatal and neonatal exposure to low-dose bisphenol A. *Neuroscience* 159: 161–171.
64. Rothstein JD, Van Kammen M, Levey AI, Martin LJ, Kuncl RW (1995) Selective loss of glial glutamate transporter GLT-1 in amyotrophic lateral sclerosis. *Ann Neurol* 38: 73–84.
65. Scimemi A, Tian H, Diamond JS (2009) Neuronal transporters regulate glutamate clearance, NMDA receptor activation, and synaptic plasticity in the hippocampus. *J Neurosci* 29: 14581–14595.
66. Aoyama K, Suh SW, Hamby AM, Liu J, Chan WY, et al. (2006) Neuronal glutathione deficiency and age-dependent neurodegeneration in the EAAC1 deficient mouse. *Nat Neurosci* 9: 119–126.
67. Gadow KD, Roohi J, DeVincent CJ, Kirsch S, Hatchwell E (2010) Glutamate transporter gene (SLC1A1) single nucleotide polymorphism (rs301430) and repetitive behaviors and anxiety in children with autism spectrum disorder. *J Autism Dev Disord* 40: 1139–1145.
68. Bailey CG, Ryan RM, Thoeng AD, Ng C, King K, et al. (2010) Loss-of-function mutations in the glutamate transporter SLC1A1 cause human dicarboxylic aminoaciduria. *J Clin Invest* 121: 446–453.
69. Arnold PD, Sicard T, Burroughs E, Richter MA, Kennedy JL (2006) Glutamate transporter gene SLC1A1 associated with obsessive-compulsive disorder. *Arch Gen Psychiatry* 63: 769–776.
70. Dickel DE, Veenstra-VanderWeele J, Cox NJ, Wu X, Fischer DJ, et al. (2006) Association testing of the positional and functional candidate gene SLC1A1/EAAC1 in early-onset obsessive-compulsive disorder. *Arch Gen Psychiatry* 63: 778–785.
71. Stewart SE, Fagerness JA, Platko J, Smoller JW, Scharf JM, et al. (2007) Association of the SLC1A1 glutamate transporter gene and obsessive-compulsive disorder. *Am J Med Genet B Neuropsychiatr Genet* 144B: 1027–1033.
72. Kwon JS, Joo YH, Nam HJ, Lim M, Cho EY, et al. (2009) Association of the glutamate transporter gene SLC1A1 with atypical antipsychotics-induced obsessive-compulsive symptoms. *Arch Gen Psychiatry* 66: 1233–1241.
73. Rodrigues SM, Saslow LR, Garcia N, John OP, Keltner D (2009) Oxytocin receptor genetic variation relates to empathy and stress reactivity in humans. *Proc Natl Acad Sci U S A* 106: 21437–21441.
74. Lauritsen MB, Als TD, Dahl HA, Flint TJ, Wang AG, et al. (2006) A genome-wide search for alleles and haplotypes associated with autism and related pervasive developmental disorders on the Faroe Islands. *Mol Psychiatry* 11: 37–46.
75. McCauley JL, Li C, Jiang L, Olson LM, Crockett G, et al. (2005) Genome-wide and Ordered-Subset linkage analyses provide support for autism loci on 17q and 19p with evidence of phenotypic and interlocus genetic correlates. *BMC Med Genet* 6: 1.
